# Supplementary material
Source: publisher figshare collection journal article supplement (https://acs.figshare.com/ndownloader/files/5195908)
Supplement: Supplementary file 1 [file 5195908]

Supporting Information 1
#==============================================================================

data___[Mn2(saltmen)2Ni(pao)2(Meim)2](ClO4)2

#==============================================================================

# CHEMICAL DATA

_chemical_formula_sum                  'C60 H66 Cl2 N12 Mn2 O14 Ni '
_chemical_formula_moiety               'C60 H66 Cl2 N12 Mn2 O14 Ni '
_chemical_formula_weight               1418.74
_chemical_melting_point                ?

#==============================================================================

# CRYSTAL DATA
_symmetry_cell_setting                 monoclinic
_symmetry_space_group_name_H-M        'C 1 2/c 1'
_symmetry_Int_Tables_number            15
loop_
_symmetry_equiv_pos_as_xyz
 'x,y,z'
 '-x,-y,-z'
 'x+1/2,y+1/2,z'
 '-x+1/2,-y+1/2,-z'
 '-x,y,-z+1/2'
 'x,-y,z+1/2'
 '-x+1/2,y+1/2,-z+1/2'
 'x+1/2,-y+1/2,z+1/2'

#------------------------------------------------------------------------------

_cell_length_a                         21.029(13)
_cell_length_b                         15.978(10)
_cell_length_c                         18.630(11)
_cell_angle_alpha                      90
_cell_angle_beta                       98.063(9)
_cell_angle_gamma                      90
_cell_volume                           6197.9(66)
_cell_formula_units_Z                  4
_cell_measurement_reflns_used          4507
_cell_measurement_theta_min            3.1
_cell_measurement_theta_max            27.5
_cell_measurement_temperature          123.1

#------------------------------------------------------------------------------

_exptl_crystal_description            'platelet'
_exptl_crystal_colour                 'brown'
_exptl_crystal_size_max                0.12
_exptl_crystal_size_mid                0.10
_exptl_crystal_size_min                0.04
_exptl_crystal_density_diffrn          1.520
_exptl_crystal_density_meas            ?
_exptl_crystal_density_method         'not measured'
_exptl_crystal_F_000                   2936.00
_exptl_absorpt_coefficient_mu          0.864
_exptl_absorpt_correction_type         none
_exptl_absorpt_correction_T_min        0.752
_exptl_absorpt_correction_T_max        0.966

#==============================================================================

# EXPERIMENTAL DATA

_diffrn_radiation_type                'Mo K�a'
_diffrn_radiation_wavelength           0.7107
_diffrn_measurement_device_type       'Rigaku Mercury'
_diffrn_measurement_method             �w
_diffrn_detector_area_resol_mean       14.62
_diffrn_reflns_number                  24613
_diffrn_reflns_av_R_equivalents        0.095
_diffrn_reflns_theta_max               27.48
_diffrn_measured_fraction_theta_max    0.9966
_diffrn_reflns_theta_full              27.50
_diffrn_measured_fraction_theta_full   0.9954
_diffrn_reflns_limit_h_min             -27
_diffrn_reflns_limit_h_max             27
_diffrn_reflns_limit_k_min             -20
_diffrn_reflns_limit_k_max             16
_diffrn_reflns_limit_l_min             -24
_diffrn_reflns_limit_l_max             21

#==============================================================================

# REFINEMENT DATA

_refine_special_details
;
    Refinement using reflections with F^2^ > 0.0 sigma(F^2^).
    The weighted R-factor (wR) and goodness of fit (S) are based on F^2^.
    R-factor (gt) are based on F. The threshold expression of
    F^2^ > 2.0 sigma(F^2^) is used only for calculating R-factor (gt).
;
_reflns_number_total                   7085
_reflns_number_gt                      3407
_reflns_threshold_expression           F^2^>2.0�s(F^2^)
_refine_ls_structure_factor_coef       Fsqd
_refine_ls_R_factor_gt                 0.1080
_refine_ls_wR_factor_ref               0.2550
_refine_ls_hydrogen_treatment          refall
_refine_ls_number_reflns               7085
_refine_ls_number_parameters           401
_refine_ls_goodness_of_fit_ref         1.077
_refine_ls_weighting_scheme            calc
_refine_ls_weighting_details
'w = 1/[0.0010Fo^2^ + 1.0000�s^2^(Fo) + 0.5000]/(4Fo^2^)'
_refine_ls_shift/su_max                0.0000
_refine_diff_density_max               3.41
_refine_diff_density_min               -2.69
_refine_ls_extinction_method           none
_refine_ls_extinction_coef             ?

loop_
_atom_type_symbol
_atom_type_description
_atom_type_scat_dispersion_real
_atom_type_scat_dispersion_imag
_atom_type_scat_source
  'C' 'C'  0.003 0.002 
;
International Tables for Crystallography
(1992, Vol. C, Tables 4.2.6.8 and 6.1.1.4)
;
  'H' 'H'  0.000 0.000 
;
International Tables for Crystallography
(1992, Vol. C, Table 6.1.1.4)
;
  'Cl' 'Cl'  0.148 0.159 
;
International Tables for Crystallography
(1992, Vol. C, Tables 4.2.6.8 and 6.1.1.4)
;
  'Mn' 'Mn'  0.337 0.728 
;
International Tables for Crystallography
(1992, Vol. C, Tables 4.2.6.8 and 6.1.1.4)
;
  'N' 'N'  0.006 0.003 
;
International Tables for Crystallography
(1992, Vol. C, Tables 4.2.6.8 and 6.1.1.4)
;
  'Ni' 'Ni'  0.339 1.112 
;
International Tables for Crystallography
(1992, Vol. C, Tables 4.2.6.8 and 6.1.1.4)
;
  'O' 'O'  0.011 0.006 
;
International Tables for Crystallography
(1992, Vol. C, Tables 4.2.6.8 and 6.1.1.4)
;

#==============================================================================

# ATOMIC COORDINATES AND THERMAL PARAMETERS

loop_
_atom_site_label
_atom_site_type_symbol
_atom_site_fract_x
_atom_site_fract_y
_atom_site_fract_z
_atom_site_U_iso_or_equiv
_atom_site_adp_type
_atom_site_occupancy
_atom_site_symmetry_multiplicity
_atom_site_calc_flag
_atom_site_refinement_flags
_atom_site_disorder_assembly
_atom_site_disorder_group
 Ni1    Ni 0.5000      0.25658(9)  0.2500      0.0276(4)   Uani 1.00 1 d . . .
 Mn1    Mn 0.31351(6)  0.20461(8)  0.05121(6)  0.0250(3)   Uani 1.00 1 d . . .
 Cl1    Cl 0.8971(2)   0.2682(3)   0.1589(3)   0.041(2)    Uiso 0.46 1 d P . .
 Cl2    Cl 0.8526(3)   0.2591(4)   0.1318(3)   0.062(2)    Uiso 0.54 1 d P . .
 O1     O  0.2878(2)   0.3182(3)   0.0344(3)   0.028(1)    Uani 1.00 1 d . . .
 O2     O  0.2584(2)   0.1875(3)   0.1210(3)   0.030(2)    Uani 1.00 1 d . . .
 O3     O  0.3957(3)   0.2423(3)   0.1216(3)   0.030(2)    Uani 1.00 1 d . . .
 O4     O  0.9526(5)   0.2224(10)  0.1461(9)   0.066(5)    Uiso 0.46 1 d P . .
 O5     O  0.8502(9)   0.2081(12)  0.1303(12)  0.100(7)    Uiso 0.46 1 d P . .
 O6     O  0.8996(8)   0.2769(10)  0.2354(3)   0.066(5)    Uiso 0.46 1 d P . .
 O7     O  0.8490(5)   0.2828(9)   0.2043(7)   0.048(4)    Uiso 0.46 1 d P . .
 O8     O  0.8920(8)   0.3297(8)   0.1221(10)  0.106(6)    Uiso 0.54 1 d P . .
 O9     O  0.8239(8)   0.3215(8)   0.0830(8)   0.095(6)    Uiso 0.54 1 d P . .
 O10    O  0.9177(4)   0.2354(13)  0.1307(11)  0.103(6)    Uiso 0.54 1 d P . .
 O11    O  0.8167(8)   0.1850(7)   0.1118(10)  0.101(6)    Uiso 0.54 1 d P . .
 N1     N  0.3681(3)   0.2098(4)   -0.0278(3)  0.023(2)    Uani 1.00 1 d . . .
 N2     N  0.3317(3)   0.0828(4)   0.0437(3)   0.028(2)    Uani 1.00 1 d . . .
 N3     N  0.4093(4)   0.2535(5)   0.1918(4)   0.045(2)    Uani 1.00 1 d . . .
 N4     N  0.4414(3)   0.2606(4)   0.3324(4)   0.033(2)    Uani 1.00 1 d . . .
 N5     N  0.500000(10) 0.3821(5)   0.250000(10) 0.039(3)    Uiso 1.00 1 d . . .
 N6     N  0.4842(6)   0.5263(5)   0.2236(6)   0.105(6)    Uiso 0.50 1 d P . .
 N7     N  0.500000(10) 0.1287(5)   0.250000(10) 0.042(3)    Uiso 1.00 1 d . . .
 N8     N  0.4730(4)   -0.0127(5)  0.2403(6)   0.082(4)    Uiso 0.50 1 d P . .
 C1     C  0.3285(4)   0.3788(5)   0.0193(4)   0.029(2)    Uani 1.00 1 d . . .
 C2     C  0.3211(4)   0.4612(5)   0.0425(5)   0.039(3)    Uani 1.00 1 d . . .
 C3     C  0.3597(4)   0.5234(6)   0.0227(6)   0.045(3)    Uani 1.00 1 d . . .
 C4     C  0.4068(5)   0.5083(6)   -0.0221(6)  0.053(3)    Uani 1.00 1 d . . .
 C5     C  0.4155(4)   0.4269(5)   -0.0454(5)  0.042(3)    Uani 1.00 1 d . . .
 C6     C  0.3777(4)   0.3608(5)   -0.0244(5)  0.037(3)    Uani 1.00 1 d . . .
 C7     C  0.3895(4)   0.2781(5)   -0.0505(4)  0.028(2)    Uani 1.00 1 d . . .
 C8     C  0.3820(4)   0.1279(5)   -0.0631(4)  0.029(2)    Uani 1.00 1 d . . .
 C9     C  0.4442(4)   0.1299(5)   -0.0943(5)  0.036(2)    Uani 1.00 1 d . . .
 C10    C  0.3271(4)   0.1141(5)   -0.1242(4)  0.034(2)    Uani 1.00 1 d . . .
 C11    C  0.3825(4)   0.0614(5)   -0.0020(4)  0.026(2)    Uani 1.00 1 d . . .
 C12    C  0.4466(4)   0.0657(5)   0.0520(4)   0.033(2)    Uani 1.00 1 d . . .
 C13    C  0.3744(4)   -0.0269(5)  -0.0321(5)  0.036(2)    Uani 1.00 1 d . . .
 C14    C  0.3094(4)   0.0250(5)   0.0824(5)   0.036(2)    Uani 1.00 1 d . . .
 C15    C  0.2668(4)   0.0389(6)   0.1360(5)   0.039(3)    Uani 1.00 1 d . . .
 C16    C  0.2502(5)   -0.0316(7)  0.1746(5)   0.049(3)    Uani 1.00 1 d . . .
 C17    C  0.2130(5)   -0.0260(7)  0.2296(6)   0.058(4)    Uani 1.00 1 d . . .
 C18    C  0.1916(5)   0.0526(7)   0.2465(5)   0.052(3)    Uani 1.00 1 d . . .
 C19    C  0.2072(4)   0.1234(6)   0.2102(5)   0.044(3)    Uani 1.00 1 d . . .
 C20    C  0.2446(4)   0.1176(5)   0.1544(4)   0.030(2)    Uani 1.00 1 d . . .
 C21    C  0.3611(5)   0.2586(6)   0.2306(5)   0.048(3)    Uani 1.00 1 d . . .
 C22    C  0.3786(4)   0.2610(6)   0.3105(5)   0.039(3)    Uani 1.00 1 d . . .
 C23    C  0.3332(5)   0.2609(6)   0.3568(5)   0.052(3)    Uani 1.00 1 d . . .
 C24    C  0.3505(6)   0.2623(7)   0.4268(5)   0.057(3)    Uani 1.00 1 d . . .
 C25    C  0.4159(5)   0.2638(6)   0.4537(5)   0.045(3)    Uani 1.00 1 d . . .
 C26    C  0.4595(5)   0.2629(5)   0.4052(4)   0.038(3)    Uani 1.00 1 d . . .
 C27    C  0.4684(6)   0.4441(5)   0.1942(4)   0.083(4)    Uiso 1.00 1 d . . .
 C28    C  0.4842(6)   0.5263(5)   0.2236(6)   0.159(6)    Uiso 0.50 1 d P . .
 C29    C  0.4660(9)   0.5997(5)   0.1906(9)   0.119(11)   Uiso 0.50 1 d P . .
 C30    C  0.4484(2)   0.0732(5)   0.2421(7)   0.071(3)    Uiso 1.00 1 d . . .
 C31    C  0.4730(4)   -0.0127(5)  0.2403(6)   0.123(4)    Uiso 0.50 1 d P . .
 C32    C  0.4369(6)   -0.0832(5)  0.2339(8)   0.078(7)    Uiso 0.50 1 d P . .
 H1     H  0.2891(4)   0.4738(5)   0.0721(5)   0.047(3)    Uiso 1.00 1 c . . .
 H2     H  0.3544(4)   0.5786(6)   0.0398(6)   0.055(3)    Uiso 1.00 1 c . . .
 H3     H  0.4323(5)   0.5528(6)   -0.0362(6)  0.063(3)    Uiso 1.00 1 c . . .
 H4     H  0.4472(4)   0.4157(5)   -0.0758(5)  0.052(3)    Uiso 1.00 1 c . . .
 H5     H  0.4156(4)   0.2741(5)   -0.0880(4)  0.034(2)    Uiso 1.00 1 c . . .
 H6     H  0.4501(4)   0.0781(5)   -0.1175(5)  0.044(3)    Uiso 1.00 1 c . . .
 H7     H  0.4430(4)   0.1740(5)   -0.1286(5)  0.044(3)    Uiso 1.00 1 c . . .
 H8     H  0.4788(4)   0.1388(5)   -0.0565(5)  0.044(3)    Uiso 1.00 1 c . . .
 H9     H  0.2879(4)   0.1092(5)   -0.1046(4)  0.041(3)    Uiso 1.00 1 c . . .
 H10    H  0.3245(4)   0.1602(5)   -0.1567(4)  0.041(3)    Uiso 1.00 1 c . . .
 H11    H  0.3345(4)   0.0642(5)   -0.1495(4)  0.041(3)    Uiso 1.00 1 c . . .
 H12    H  0.4450(4)   0.0266(5)   0.0902(4)   0.040(3)    Uiso 1.00 1 c . . .
 H13    H  0.4817(4)   0.0526(5)   0.0271(4)   0.040(3)    Uiso 1.00 1 c . . .
 H14    H  0.4520(4)   0.1205(5)   0.0717(4)   0.040(3)    Uiso 1.00 1 c . . .
 H15    H  0.3315(4)   -0.0344(5)  -0.0551(5)  0.044(3)    Uiso 1.00 1 c . . .
 H16    H  0.4032(4)   -0.0355(5)  -0.0665(5)  0.044(3)    Uiso 1.00 1 c . . .
 H17    H  0.3835(4)   -0.0661(5)  0.0063(5)   0.044(3)    Uiso 1.00 1 c . . .
 H18    H  0.3221(4)   -0.0311(5)  0.0750(5)   0.043(3)    Uiso 1.00 1 c . . .
 H19    H  0.2652(5)   -0.0850(7)  0.1623(5)   0.060(3)    Uiso 1.00 1 c . . .
 H20    H  0.2024(5)   -0.0743(7)  0.2551(6)   0.072(4)    Uiso 1.00 1 c . . .
 H21    H  0.1656(5)   0.0580(7)   0.2839(5)   0.064(4)    Uiso 1.00 1 c . . .
 H22    H  0.1923(4)   0.1766(6)   0.2235(5)   0.054(3)    Uiso 1.00 1 c . . .
 H23    H  0.3177(5)   0.2608(6)   0.2084(5)   0.059(3)    Uiso 1.00 1 c . . .
 H24    H  0.2889(5)   0.2598(6)   0.3377(5)   0.064(3)    Uiso 1.00 1 c . . .
 H25    H  0.3192(6)   0.2624(7)   0.4589(5)   0.070(4)    Uiso 1.00 1 c . . .
 H26    H  0.4300(5)   0.2653(6)   0.5044(5)   0.054(3)    Uiso 1.00 1 c . . .
 H27    H  0.5040(5)   0.2640(5)   0.4233(4)   0.047(3)    Uiso 1.00 1 c . . .


loop_
_atom_site_aniso_label
_atom_site_aniso_U_11
_atom_site_aniso_U_22
_atom_site_aniso_U_33
_atom_site_aniso_U_12
_atom_site_aniso_U_13
_atom_site_aniso_U_23
 Ni1    0.0315(8)   0.0255(8)   0.0258(8)   0.0000      0.0039(6)   0.0000     
 Mn1    0.0247(6)   0.0274(6)   0.0244(6)   0.0059(5)   0.0084(5)   0.0024(5)  
 O1     0.023(3)    0.029(3)    0.034(3)    -0.001(2)   0.011(2)    -0.003(2)  
 O2     0.027(3)    0.033(3)    0.031(3)    0.008(2)    0.013(2)    0.008(2)   
 O3     0.034(3)    0.039(3)    0.017(3)    -0.003(3)   0.001(2)    -0.005(2)  
 N1     0.024(3)    0.021(3)    0.022(3)    0.001(3)    0.002(3)    -0.001(3)  
 N2     0.031(4)    0.028(4)    0.030(4)    0.003(3)    0.017(3)    -0.001(3)  
 N3     0.047(5)    0.058(5)    0.031(4)    0.006(4)    0.003(4)    -0.006(4)  
 N4     0.032(4)    0.029(4)    0.038(4)    0.000(3)    0.005(3)    0.002(3)   
 C1     0.024(4)    0.029(4)    0.034(5)    0.005(3)    0.004(4)    -0.001(4)  
 C2     0.035(5)    0.021(4)    0.061(6)    -0.004(4)   0.007(4)    -0.011(4)  
 C3     0.029(5)    0.031(5)    0.077(7)    -0.003(4)   0.016(5)    -0.005(5)  
 C4     0.042(6)    0.034(5)    0.083(8)    -0.013(4)   0.009(5)    0.007(5)   
 C5     0.031(5)    0.035(5)    0.064(6)    -0.004(4)   0.016(4)    0.005(5)   
 C6     0.034(5)    0.028(5)    0.049(6)    -0.007(4)   0.008(4)    0.003(4)   
 C7     0.028(4)    0.030(4)    0.029(4)    0.001(3)    0.010(3)    -0.004(3)  
 C8     0.028(4)    0.037(5)    0.026(4)    0.003(4)    0.012(3)    -0.003(3)  
 C9     0.032(5)    0.044(5)    0.035(5)    0.009(4)    0.018(4)    0.004(4)   
 C10    0.041(5)    0.029(4)    0.034(5)    0.004(4)    0.011(4)    -0.004(4)  
 C11    0.026(4)    0.022(4)    0.032(4)    0.007(3)    0.012(3)    0.005(3)   
 C12    0.029(4)    0.040(5)    0.031(4)    0.009(4)    0.010(4)    0.001(4)   
 C13    0.039(5)    0.032(5)    0.038(5)    0.006(4)    0.015(4)    0.007(4)   
 C14    0.039(5)    0.028(5)    0.040(5)    -0.007(4)   0.004(4)    0.004(4)   
 C15    0.039(5)    0.040(5)    0.042(5)    -0.003(4)   0.020(4)    0.006(4)   
 C16    0.054(6)    0.061(7)    0.035(5)    -0.006(5)   0.019(5)    0.006(5)   
 C17    0.060(7)    0.063(7)    0.057(7)    -0.014(6)   0.025(6)    0.011(6)   
 C18    0.052(6)    0.079(8)    0.030(5)    -0.015(6)   0.026(4)    -0.001(5)  
 C19    0.041(5)    0.055(6)    0.040(5)    -0.007(5)   0.020(4)    0.004(5)   
 C20    0.031(4)    0.039(5)    0.023(4)    -0.003(4)   0.009(3)    0.004(4)   
 C21    0.046(6)    0.049(6)    0.052(6)    -0.003(5)   0.014(5)    -0.010(5)  
 C22    0.041(5)    0.039(5)    0.042(5)    -0.007(4)   0.020(4)    -0.014(4)  
 C23    0.057(6)    0.061(7)    0.042(6)    -0.004(5)   0.022(5)    -0.011(5)  
 C24    0.074(8)    0.057(7)    0.044(6)    0.007(6)    0.024(5)    0.004(5)   
 C25    0.052(6)    0.043(6)    0.039(5)    0.010(5)    0.009(5)    0.002(4)   
 C26    0.050(6)    0.036(5)    0.031(4)    -0.010(4)   0.010(4)    -0.009(4)  

#==============================================================================

_computing_data_collection            'CrystalClear'
_computing_cell_refinement            'CrystalClear'
_computing_data_reduction             'CrystalStructure'
_computing_structure_solution         'SIR92'
_computing_structure_refinement       'CRYSTALS'
_computing_publication_material       'CrystalStructure Ver. 3.00'
_computing_molecular_graphics          ?

#==============================================================================

# MOLECULAR GEOMETRY

_geom_special_details
;
    ENTER SPECIAL DETAILS OF THE MOLECULAR GEOMETRY
;

 
 
loop_
 _geom_bond_atom_site_label_1
 _geom_bond_site_symmetry_1
 _geom_bond_atom_site_label_2
 _geom_bond_site_symmetry_2
 _geom_bond_distance
 _geom_bond_publ_flag
Ni1 . N3 . 2.058(8) yes
Ni1 . N4 . 2.100(7) yes
Ni1 . N5 . 2.005(8) yes
Ni1 . N7 . 2.044(8) yes
Mn1 . O1 . 1.907(5) yes
Mn1 . O2 . 1.878(5) yes
Mn1 . O3 . 2.106(5) yes
Mn1 . N1 . 1.992(6) yes
Mn1 . N2 . 1.992(7) yes
Cl1 . Cl2 . 1.010(7) yes
Cl1 . O4 . 1.4250(12) yes
Cl1 . O5 . 1.4250(11) yes
Cl1 . O6 . 1.4250(13) yes
Cl1 . O7 . 1.4255(12) yes
Cl1 . O8 . 1.194(14) yes
Cl1 . O10 . 0.896(15) yes
Cl2 . O5 . 0.816(17) yes
Cl2 . O7 . 1.414(11) yes
Cl2 . O8 . 1.4258(12) yes
Cl2 . O9 . 1.4249(11) yes
Cl2 . O10 . 1.4251(13) yes
Cl2 . O11 . 1.4250(12) yes
O1 . C1 . 1.346(9) yes
O2 . C20 . 1.330(9) yes
O3 . N3 . 1.311(8) yes
O4 . O10 . 0.777(15) yes
O5 . O10 . 1.485(19) yes
O5 . O11 . 0.827(15) yes
O6 . O7 . 1.141(18) yes
O8 . O9 . 1.52(2) yes
O8 . O10 . 1.60(2) yes
N1 . C7 . 1.274(9) yes
N1 . C8 . 1.511(9) yes
N2 . C11 . 1.498(9) yes
N2 . C14 . 1.30(1) yes
N3 . C21 . 1.327(11) yes
N4 . C22 . 1.33(1) yes
N4 . C26 . 1.36(1) yes
N5 . C27 . 1.5199(6) yes
N6 . C27 . 1.4444(7) yes
N6 . C29 . 1.3532(7) yes
N7 . C30 . 1.3931(6) yes
N8 . C30 . 1.4700(8) yes
N8 . C32 . 1.3538(6) yes
C1 . C2 . 1.401(11) yes
C1 . C6 . 1.433(11) yes
C2 . C3 . 1.366(11) yes
C2 . H1 . 0.95(1) no
C3 . C4 . 1.404(13) yes
C3 . H2 . 0.950(13) no
C4 . C5 . 1.392(12) yes
C4 . H3 . 0.95(1) no
C5 . C6 . 1.410(11) yes
C5 . H4 . 0.95(1) no
C6 . C7 . 1.442(11) yes
C7 . H5 . 0.950(12) no
C8 . C9 . 1.50(1) yes
C8 . C10 . 1.519(11) yes
C8 . C11 . 1.56(1) yes
C9 . H6 . 0.950(12) no
C9 . H7 . 0.950(12) no
C9 . H8 . 0.950(12) no
C10 . H9 . 0.950(13) no
C10 . H10 . 0.950(11) no
C10 . H11 . 0.950(12) no
C11 . C12 . 1.57(1) yes
C11 . C13 . 1.519(11) yes
C12 . H12 . 0.950(12) no
C12 . H13 . 0.950(12) no
C12 . H14 . 0.950(12) no
C13 . H15 . 0.950(12) no
C13 . H16 . 0.950(13) no
C13 . H17 . 0.950(12) no
C14 . C15 . 1.449(12) yes
C14 . H18 . 0.950(12) no
C15 . C16 . 1.407(12) yes
C15 . C20 . 1.401(12) yes
C16 . C17 . 1.376(13) yes
C16 . H19 . 0.95(2) no
C17 . C18 . 1.385(14) yes
C17 . H20 . 0.95(2) no
C18 . C19 . 1.380(12) yes
C18 . H21 . 0.95(2) no
C19 . C20 . 1.392(11) yes
C19 . H22 . 0.95(1) no
C21 . C22 . 1.482(12) yes
C21 . H23 . 0.95(1) no
C22 . C23 . 1.372(12) yes
C23 . C24 . 1.303(13) yes
C23 . H24 . 0.95(2) no
C24 . C25 . 1.398(14) yes
C24 . H25 . 0.95(2) no
C25 . C26 . 1.374(12) yes
C25 . H26 . 0.950(13) no
C26 . H27 . 0.950(13) no
C27 . C28 . 1.4444(7) yes
C28 . C29 . 1.3532(7) yes
C30 . C31 . 1.4700(8) yes
C31 . C32 . 1.3538(6) yes

loop_
 _geom_angle_atom_site_label_1
 _geom_angle_site_symmetry_1
 _geom_angle_atom_site_label_2
 _geom_angle_site_symmetry_2
 _geom_angle_atom_site_label_3
 _geom_angle_site_symmetry_3
 _geom_angle
 _geom_angle_publ_flag
N3 . Ni1 . N4 . 77.9(3) yes
N3 . Ni1 . N5 . 91.4(2) yes
N4 . Ni1 . N5 . 88.3(2) yes
N3 . Ni1 . N7 . 88.6(2) yes
N4 . Ni1 . N7 . 91.7(2) yes
N5 . Ni1 . N7 . 179.994 yes
O1 . Mn1 . O2 . 93.7(2) yes
O1 . Mn1 . O3 . 91.1(2) yes
O2 . Mn1 . O3 . 98.2(2) yes
O1 . Mn1 . N1 . 91.1(2) yes
O2 . Mn1 . N1 . 173.2(3) yes
O3 . Mn1 . N1 . 86.6(2) yes
O1 . Mn1 . N2 . 166.2(3) yes
O2 . Mn1 . N2 . 92.8(2) yes
O3 . Mn1 . N2 . 100.0(3) yes
N1 . Mn1 . N2 . 81.5(3) yes
Cl2 . Cl1 . O4 . 124.5(9) yes
Cl2 . Cl1 . O5 . 34.1(10) yes
O4 . Cl1 . O5 . 97.6(13) yes
Cl2 . Cl1 . O6 . 114.5(8) yes
O4 . Cl1 . O6 . 107.5(10) yes
O5 . Cl1 . O6 . 111.5(12) yes
Cl2 . Cl1 . O7 . 68.5(7) yes
O4 . Cl1 . O7 . 148.1(10) yes
O5 . Cl1 . O7 . 79.7(12) yes
O6 . Cl1 . O7 . 47.2(8) yes
Cl2 . Cl1 . O8 . 80.1(7) yes
O4 . Cl1 . O8 . 109.7(12) yes
O5 . Cl1 . O8 . 109.7(13) yes
O6 . Cl1 . O8 . 118.7(12) yes
O7 . Cl1 . O8 . 101.0(11) yes
Cl2 . Cl1 . O10 . 96.6(10) yes
O4 . Cl1 . O10 . 29.2(14) yes
O5 . Cl1 . O10 . 75.8(14) yes
O6 . Cl1 . O10 . 133.7(15) yes
O7 . Cl1 . O10 . 152.4(15) yes
O8 . Cl1 . O10 . 99.0(16) yes
Cl1 . Cl2 . O5 . 102.1(14) yes
Cl1 . Cl2 . O7 . 69.8(5) yes
O5 . Cl2 . O7 . 106.9(19) yes
Cl1 . Cl2 . O8 . 55.6(8) yes
O5 . Cl2 . O8 . 144.9(19) yes
O7 . Cl2 . O8 . 91.1(10) yes
Cl1 . Cl2 . O9 . 119.9(9) yes
O5 . Cl2 . O9 . 131.0(18) yes
O7 . Cl2 . O9 . 110.4(10) yes
O8 . Cl2 . O9 . 64.3(10) yes
Cl1 . Cl2 . O10 . 38.7(8) yes
O5 . Cl2 . O10 . 77.8(16) yes
O7 . Cl2 . O10 . 105.4(10) yes
O8 . Cl2 . O10 . 68.3(11) yes
O9 . Cl2 . O10 . 119.8(12) yes
Cl1 . Cl2 . O11 . 132.1(10) yes
O5 . Cl2 . O11 . 30.0(17) yes
O7 . Cl2 . O11 . 112.0(10) yes
O8 . Cl2 . O11 . 156.9(12) yes
O9 . Cl2 . O11 . 104.6(11) yes
O10 . Cl2 . O11 . 104.5(12) yes
Mn1 . O1 . C1 . 123.0(5) yes
Mn1 . O2 . C20 . 130.0(5) yes
Mn1 . O3 . N3 . 134.9(5) yes
Cl1 . O4 . O10 . 34.2(15) yes
Cl1 . O5 . Cl2 . 43.9(5) yes
Cl1 . O5 . O10 . 35.8(7) yes
Cl2 . O5 . O10 . 69.7(11) yes
Cl1 . O5 . O11 . 164.0(32) yes
Cl2 . O5 . O11 . 120.3(35) yes
O10 . O5 . O11 . 153.2(34) yes
Cl1 . O6 . O7 . 66.4(4) yes
Cl1 . O7 . Cl2 . 41.7(3) yes
Cl1 . O7 . O6 . 66.4(4) yes
Cl2 . O7 . O6 . 107.0(5) yes
Cl1 . O8 . Cl2 . 44.3(4) yes
Cl1 . O8 . O9 . 102.0(6) yes
Cl2 . O8 . O9 . 57.8(5) yes
Cl1 . O8 . O10 . 33.6(8) yes
Cl2 . O8 . O10 . 55.8(6) yes
O9 . O8 . O10 . 104.5(9) yes
Cl2 . O9 . O8 . 57.9(5) yes
Cl1 . O10 . Cl2 . 44.7(4) yes
Cl1 . O10 . O4 . 116.6(28) yes
Cl2 . O10 . O4 . 157.6(27) yes
Cl1 . O10 . O5 . 68.4(10) yes
Cl2 . O10 . O5 . 32.5(8) yes
O4 . O10 . O5 . 140.8(32) yes
Cl1 . O10 . O8 . 47.5(11) yes
Cl2 . O10 . O8 . 55.8(5) yes
O4 . O10 . O8 . 125.2(28) yes
O5 . O10 . O8 . 88.0(11) yes
Cl2 . O11 . O5 . 29.6(18) yes
Mn1 . N1 . C7 . 123.2(5) yes
Mn1 . N1 . C8 . 116.9(5) yes
C7 . N1 . C8 . 119.9(6) yes
Mn1 . N2 . C11 . 115.0(5) yes
Mn1 . N2 . C14 . 124.7(6) yes
C11 . N2 . C14 . 119.6(7) yes
Ni1 . N3 . O3 . 125.8(6) yes
Ni1 . N3 . C21 . 115.7(6) yes
O3 . N3 . C21 . 118.4(8) yes
Ni1 . N4 . C22 . 116.0(6) yes
Ni1 . N4 . C26 . 128.3(6) yes
C22 . N4 . C26 . 115.7(8) yes
Ni1 . N5 . C27 . 130.7(3) yes
C27 . N6 . C29 . 125.47(4) yes
Ni1 . N7 . C30 . 129.5(2) yes
C30 . N8 . C32 . 125.73(4) yes
O1 . C1 . C2 . 120.6(7) yes
O1 . C1 . C6 . 120.3(7) yes
C2 . C1 . C6 . 119.0(8) yes
C1 . C2 . C3 . 120.3(9) yes
C1 . C2 . H1 . 119.8(10) no
C3 . C2 . H1 . 119.9(10) no
C2 . C3 . C4 . 122.1(9) yes
C2 . C3 . H2 . 118.9(11) no
C4 . C3 . H2 . 118.9(11) no
C3 . C4 . C5 . 118.7(9) yes
C3 . C4 . H3 . 120.7(12) no
C5 . C4 . H3 . 120.7(12) no
C4 . C5 . C6 . 120.7(9) yes
C4 . C5 . H4 . 119.7(11) no
C6 . C5 . H4 . 119.7(10) no
C1 . C6 . C5 . 119.2(8) yes
C1 . C6 . C7 . 123.2(7) yes
C5 . C6 . C7 . 117.5(8) yes
N1 . C7 . C6 . 126.0(7) yes
N1 . C7 . H5 . 117.0(9) no
C6 . C7 . H5 . 117.0(9) no
N1 . C8 . C9 . 112.4(7) yes
N1 . C8 . C10 . 106.2(6) yes
C9 . C8 . C10 . 108.9(7) yes
N1 . C8 . C11 . 104.8(6) yes
C9 . C8 . C11 . 112.3(7) yes
C10 . C8 . C11 . 112.0(7) yes
C8 . C9 . H6 . 109.5(9) no
C8 . C9 . H7 . 109.5(9) no
H6 . C9 . H7 . 109.5(11) no
C8 . C9 . H8 . 109.5(9) no
H6 . C9 . H8 . 109.5(11) no
H7 . C9 . H8 . 109.5(11) no
C8 . C10 . H9 . 109.5(9) no
C8 . C10 . H10 . 109.5(9) no
H9 . C10 . H10 . 109.5(11) no
C8 . C10 . H11 . 109.5(9) no
H9 . C10 . H11 . 109.5(11) no
H10 . C10 . H11 . 109.5(11) no
N2 . C11 . C8 . 109.1(6) yes
N2 . C11 . C12 . 104.0(6) yes
C8 . C11 . C12 . 110.9(6) yes
N2 . C11 . C13 . 111.8(6) yes
C8 . C11 . C13 . 112.0(6) yes
C12 . C11 . C13 . 108.7(6) yes
C11 . C12 . H12 . 109.5(9) no
C11 . C12 . H13 . 109.5(9) no
H12 . C12 . H13 . 109.5(11) no
C11 . C12 . H14 . 109.5(9) no
H12 . C12 . H14 . 109.5(11) no
H13 . C12 . H14 . 109.5(11) no
C11 . C13 . H15 . 109.4(9) no
C11 . C13 . H16 . 109.5(9) no
H15 . C13 . H16 . 109.5(11) no
C11 . C13 . H17 . 109.5(9) no
H15 . C13 . H17 . 109.5(11) no
H16 . C13 . H17 . 109.5(11) no
N2 . C14 . C15 . 125.3(8) yes
N2 . C14 . H18 . 117.3(10) no
C15 . C14 . H18 . 117.3(10) no
C14 . C15 . C16 . 116.8(8) yes
C14 . C15 . C20 . 124.5(8) yes
C16 . C15 . C20 . 118.6(8) yes
C15 . C16 . C17 . 122.5(10) yes
C15 . C16 . H19 . 118.8(11) no
C17 . C16 . H19 . 118.8(12) no
C16 . C17 . C18 . 117.7(10) yes
C16 . C17 . H20 . 121.2(13) no
C18 . C17 . H20 . 121.2(13) no
C17 . C18 . C19 . 121.6(9) yes
C17 . C18 . H21 . 119.2(12) no
C19 . C18 . H21 . 119.2(12) no
C18 . C19 . C20 . 120.7(9) yes
C18 . C19 . H22 . 119.7(11) no
C20 . C19 . H22 . 119.7(11) no
O2 . C20 . C15 . 122.5(7) yes
O2 . C20 . C19 . 118.5(8) yes
C15 . C20 . C19 . 119.0(8) yes
N3 . C21 . C22 . 116.7(9) yes
N3 . C21 . H23 . 121.7(11) no
C22 . C21 . H23 . 121.7(11) no
N4 . C22 . C21 . 113.7(8) yes
N4 . C22 . C23 . 123.8(9) yes
C21 . C22 . C23 . 122.4(9) yes
C22 . C23 . C24 . 120.5(11) yes
C22 . C23 . H24 . 119.7(12) no
C24 . C23 . H24 . 119.7(12) no
C23 . C24 . C25 . 118.8(10) yes
C23 . C24 . H25 . 120.6(13) no
C25 . C24 . H25 . 120.6(12) no
C24 . C25 . C26 . 118.6(9) yes
C24 . C25 . H26 . 120.7(11) no
C26 . C25 . H26 . 120.7(11) no
N4 . C26 . C25 . 122.5(9) yes
N4 . C26 . H27 . 118.8(10) no
C25 . C26 . H27 . 118.7(10) no
N5 . C27 . N6 . 106.17(5) yes
N5 . C27 . C28 . 106.17(5) yes
C27 . C28 . C29 . 125.47(4) yes
N7 . C30 . N8 . 108.94(6) yes
N7 . C30 . C31 . 108.94(6) yes
C30 . C31 . C32 . 125.73(4) yes

loop_
_geom_contact_atom_site_label_1
_geom_contact_site_symmetry_1
_geom_contact_atom_site_label_2
_geom_contact_site_symmetry_2
_geom_contact_distance
_geom_contact_publ_flag
Ni1 . O3 . 3.019(5) yes
Ni1 . O3 5_655 3.019(5) yes
Ni1 . N3 . 2.058(8) yes
Ni1 . N3 5_655 2.058(8) yes
Ni1 . N4 . 2.100(7) yes
Ni1 . N4 5_655 2.100(7) yes
Ni1 . N5 . 2.005(8) yes
Ni1 . N7 . 2.044(8) yes
Ni1 . C21 . 2.89(1) yes
Ni1 . C21 5_655 2.89(1) yes
Ni1 . C22 . 2.934(9) yes
Ni1 . C22 5_655 2.934(9) yes
Ni1 . C26 . 3.128(8) yes
Ni1 . C26 5_655 3.128(8) yes
Ni1 . C27 . 3.210(8) yes
Ni1 . C27 5_655 3.210(8) yes
Ni1 . C30 . 3.121(7) yes
Ni1 . C30 5_655 3.121(7) yes
Ni1 . H27 . 3.220(9) no
Ni1 . H27 5_655 3.220(9) no
Mn1 . O1 . 1.907(5) yes
Mn1 . O1 4_555 2.503(6) yes
Mn1 . O2 . 1.878(5) yes
Mn1 . O3 . 2.106(5) yes
Mn1 . N1 . 1.992(6) yes
Mn1 . N2 . 1.992(7) yes
Mn1 . N3 . 3.170(7) yes
Mn1 . C1 . 2.872(8) yes
Mn1 . C1 4_555 3.364(8) yes
Mn1 . C6 . 3.250(8) yes
Mn1 . C7 . 2.893(8) yes
Mn1 . C8 . 2.996(8) yes
Mn1 . C11 . 2.955(7) yes
Mn1 . C12 . 3.570(8) yes
Mn1 . C14 . 2.932(9) yes
Mn1 . C15 . 3.302(9) yes
Mn1 . C20 . 2.916(8) yes
Mn1 . C21 . 3.46(1) yes
Mn1 . H9 . 3.256(9) no
Mn1 . H14 . 3.180(9) no
Mn1 . H23 . 3.050(10) no
Cl1 . Cl2 . 1.010(7) yes
Cl1 . O4 . 1.4250(12) yes
Cl1 . O5 . 1.4250(11) yes
Cl1 . O6 . 1.4250(13) yes
Cl1 . O7 . 1.4255(12) yes
Cl1 . O8 . 1.194(14) yes
Cl1 . O9 . 2.12(1) yes
Cl1 . O10 . 0.896(15) yes
Cl1 . O11 . 2.23(1) yes
Cl1 . C29 3_545 3.075(11) yes
Cl1 . C32 3_555 2.822(11) yes
Cl1 . H22 5_655 3.41(8) no
Cl1 . H26 8_554 3.1(2) no
Cl2 . O4 . 2.16(1) yes
Cl2 . O5 . 0.816(17) yes
Cl2 . O6 . 2.06(1) yes
Cl2 . O7 . 1.414(11) yes
Cl2 . O8 . 1.4258(12) yes
Cl2 . O9 . 1.4249(11) yes
Cl2 . O10 . 1.4251(13) yes
Cl2 . O11 . 1.4250(12) yes
Cl2 . C29 3_545 3.556(13) yes
Cl2 . C32 3_555 3.487(12) yes
Cl2 . H2 3_545 3.36(6) no
Cl2 . H18 3_555 3.55(5) no
Cl2 . H19 3_555 3.19(6) no
Cl2 . H22 5_655 3.26(9) no
Cl2 . H24 5_655 3.1(2) no
Cl2 . H25 8_554 3.2(2) no
Cl2 . H26 8_554 3.1(2) no
O1 . O2 . 2.761(7) yes
O1 . O2 4_555 2.923(8) yes
O1 . O3 . 2.867(7) yes
O1 . N1 . 2.784(8) yes
O1 . N1 4_555 3.295(8) yes
O1 . N2 4_555 3.148(9) yes
O1 . C1 . 1.346(9) yes
O1 . C2 . 2.387(9) yes
O1 . C6 . 2.41(1) yes
O1 . C7 . 2.905(9) yes
O1 . C10 4_555 3.31(1) yes
O1 . H1 . 2.582(10) no
O1 . H9 4_555 2.48(2) no
O1 . H10 4_555 3.52(2) no
O1 . H23 . 3.342(12) no
O2 . O3 . 3.014(8) yes
O2 . N1 4_555 3.390(8) yes
O2 . N2 . 2.804(8) yes
O2 . N3 . 3.43(1) yes
O2 . C1 4_555 3.15(1) yes
O2 . C6 4_555 3.25(1) yes
O2 . C7 4_555 3.250(9) yes
O2 . C14 . 2.937(11) yes
O2 . C15 . 2.39(1) yes
O2 . C19 . 2.34(1) yes
O2 . C20 . 1.330(9) yes
O2 . C21 . 2.982(11) yes
O2 . H9 4_555 3.39(2) no
O2 . H10 4_555 3.12(3) no
O2 . H22 . 2.52(2) no
O2 . H23 . 2.237(13) no
O3 . N1 . 2.812(8) yes
O3 . N2 . 3.141(8) yes
O3 . N3 . 1.311(8) yes
O3 . N4 5_655 3.427(9) yes
O3 . N7 . 3.516(7) yes
O3 . C1 . 3.10(1) yes
O3 . C6 . 3.29(1) yes
O3 . C7 . 3.242(9) yes
O3 . C12 . 3.34(1) yes
O3 . C21 . 2.265(11) yes
O3 . C22 . 3.60(1) yes
O3 . C26 5_655 3.172(11) yes
O3 . C30 . 3.588(11) yes
O3 . H14 . 2.520(11) no
O3 . H23 . 2.48(2) no
O3 . H27 5_655 2.40(5) no
O4 . O5 . 2.14(2) yes
O4 . O6 . 2.299(15) yes
O4 . O7 . 2.741(7) yes
O4 . O8 . 2.15(2) yes
O4 . O9 . 3.212(15) yes
O4 . O10 . 0.777(15) yes
O4 . O11 . 2.90(2) yes
O4 . N6 3_545 3.474(18) yes
O4 . C9 4_655 3.436(19) yes
O4 . C25 8_554 3.57(2) yes
O4 . C28 3_545 3.474(18) yes
O4 . C29 3_545 2.132(18) yes
O4 . C32 3_555 3.547(17) yes
O4 . H2 3_545 3.51(9) no
O4 . H4 4_655 3.44(13) no
O4 . H5 4_655 3.1(2) no
O4 . H7 4_655 2.8(2) no
O4 . H8 4_655 3.24(12) no
O4 . H26 8_554 2.6(3) no
O5 . O6 . 2.356(17) yes
O5 . O7 . 1.83(2) yes
O5 . O8 . 2.146(15) yes
O5 . O9 . 2.06(2) yes
O5 . O10 . 1.485(19) yes
O5 . O11 . 0.827(15) yes
O5 . C3 3_545 3.59(2) yes
O5 . C18 5_655 3.58(2) yes
O5 . C29 3_545 3.07(3) yes
O5 . H2 3_545 2.68(11) no
O5 . H21 5_655 2.9(2) no
O5 . H22 5_655 3.03(13) no
O5 . H24 5_655 3.2(2) no
O5 . H25 8_554 3.2(2) no
O5 . H26 8_554 3.1(2) no
O6 . O7 . 1.141(18) yes
O6 . O8 . 2.26(2) yes
O6 . O9 . 3.135(15) yes
O6 . O10 . 2.14(2) yes
O6 . O11 . 3.060(17) yes
O6 . C9 8_555 3.512(12) yes
O6 . C19 5_655 3.567(19) yes
O6 . C29 3_545 3.32(2) yes
O6 . C32 3_555 2.371(18) yes
O6 . H5 8_555 3.4(2) no
O6 . H7 8_555 2.7(2) no
O6 . H10 8_555 2.9(3) no
O6 . H22 5_655 2.70(12) no
O7 . O8 . 2.027(16) yes
O7 . O9 . 2.331(17) yes
O7 . O10 . 2.258(13) yes
O7 . O11 . 2.354(18) yes
O7 . C19 5_655 3.309(16) yes
O7 . C32 3_555 2.832(16) yes
O7 . H7 8_555 3.5(1) no
O7 . H10 8_555 2.9(2) no
O7 . H19 3_555 2.79(9) no
O7 . H22 5_655 2.40(10) no
O7 . H24 5_655 2.92(12) no
O8 . O9 . 1.52(2) yes
O8 . O10 . 1.60(2) yes
O8 . O11 . 2.793(6) yes
O8 . C14 3_555 3.60(2) yes
O8 . C25 8_554 3.57(2) yes
O8 . C32 3_555 2.57(2) yes
O8 . H7 4_655 3.46(13) no
O8 . H8 4_655 3.17(10) no
O8 . H12 3_555 3.42(6) no
O8 . H17 3_555 2.71(11) no
O8 . H18 3_555 2.74(10) no
O8 . H19 3_555 3.18(10) no
O8 . H25 8_554 3.5(2) no
O8 . H26 8_554 2.9(2) no
O9 . O10 . 2.466(15) yes
O9 . O11 . 2.255(17) yes
O9 . C13 3_555 3.498(15) yes
O9 . C14 3_555 3.266(16) yes
O9 . C16 3_555 3.40(2) yes
O9 . C24 8_554 3.32(2) yes
O9 . C25 8_554 3.57(2) yes
O9 . H15 3_555 3.47(9) no
O9 . H17 3_555 2.71(9) no
O9 . H18 3_555 2.36(10) no
O9 . H19 3_555 2.54(13) no
O9 . H24 5_655 3.1(2) no
O9 . H25 5_655 3.1(2) no
O9 . H25 8_554 2.7(3) no
O9 . H26 8_554 3.2(2) no
O10 . O11 . 2.254(19) yes
O10 . C25 8_554 3.29(2) yes
O10 . C29 3_545 2.58(2) yes
O10 . C32 3_555 3.47(2) yes
O10 . H2 3_545 3.21(9) no
O10 . H7 4_655 3.3(1) no
O10 . H8 4_655 3.40(9) no
O10 . H25 8_554 3.6(2) no
O10 . H26 8_554 2.4(3) no
O11 . C3 3_545 3.267(19) yes
O11 . C18 5_655 3.41(2) yes
O11 . C19 5_655 3.56(2) yes
O11 . C23 5_655 3.50(2) yes
O11 . C29 3_545 3.55(2) yes
O11 . H1 3_545 3.49(7) no
O11 . H2 3_545 2.37(10) no
O11 . H21 5_655 2.8(2) no
O11 . H22 5_655 3.10(12) no
O11 . H24 5_655 2.8(2) no
O11 . H25 5_655 3.2(2) no
O11 . H25 8_554 3.0(2) no
O11 . H26 8_554 3.4(2) no
N1 . N2 . 2.601(9) yes
N1 . C1 . 2.99(1) yes
N1 . C6 . 2.42(1) yes
N1 . C7 . 1.274(9) yes
N1 . C8 . 1.511(9) yes
N1 . C9 . 2.51(1) yes
N1 . C10 . 2.42(1) yes
N1 . C11 . 2.43(1) yes
N1 . C12 . 3.09(1) yes
N1 . H5 . 1.904(12) no
N1 . H6 . 3.320(13) no
N1 . H7 . 2.68(2) no
N1 . H8 . 2.710(11) no
N1 . H9 . 2.610(13) no
N1 . H10 . 2.570(12) no
N1 . H11 . 3.260(11) no
N1 . H13 . 3.520(12) no
N1 . H14 . 2.77(1) no
N1 . H27 5_655 3.21(7) no
N2 . C1 4_555 3.46(1) yes
N2 . C2 4_555 3.457(11) yes
N2 . C8 . 2.49(1) yes
N2 . C10 . 3.16(1) yes
N2 . C11 . 1.498(9) yes
N2 . C12 . 2.41(1) yes
N2 . C13 . 2.50(1) yes
N2 . C14 . 1.30(1) yes
N2 . C15 . 2.44(1) yes
N2 . C20 . 3.00(1) yes
N2 . H1 4_555 3.22(2) no
N2 . H9 . 2.820(13) no
N2 . H12 . 2.580(12) no
N2 . H13 . 3.250(11) no
N2 . H14 . 2.580(11) no
N2 . H15 . 2.630(11) no
N2 . H16 . 3.30(1) no
N2 . H17 . 2.750(11) no
N2 . H18 . 1.930(11) no
N3 . N4 . 2.61(1) yes
N3 . N4 5_655 3.237(11) yes
N3 . N5 . 2.91(1) yes
N3 . N7 . 2.87(1) yes
N3 . C21 . 1.327(11) yes
N3 . C22 . 2.392(11) yes
N3 . C26 5_655 3.507(12) yes
N3 . C27 . 3.288(13) yes
N3 . C30 . 3.104(12) yes
N3 . H14 . 3.300(13) no
N3 . H23 . 2.00(1) no
N3 . H27 5_655 3.01(3) no
N4 . N5 . 2.859(9) yes
N4 . N7 . 2.974(9) yes
N4 . C21 . 2.354(12) yes
N4 . C22 . 1.33(1) yes
N4 . C23 . 2.381(12) yes
N4 . C24 . 2.773(13) yes
N4 . C25 . 2.395(12) yes
N4 . C26 . 1.36(1) yes
N4 . C27 5_655 3.565(13) yes
N4 . C30 . 3.447(11) yes
N4 . H14 5_655 3.48(2) no
N4 . H23 . 3.23(2) no
N4 . H24 . 3.222(13) no
N4 . H26 . 3.248(12) no
N4 . H27 . 2.00(1) no
N5 . N6 . 2.3705(14) yes
N5 . N6 5_655 2.3705(14) yes
N5 . C21 . 3.500(11) yes
N5 . C21 5_655 3.500(11) yes
N5 . C22 . 3.51(1) yes
N5 . C22 5_655 3.51(1) yes
N5 . C27 . 1.5199(6) yes
N5 . C27 5_655 1.5199(6) yes
N5 . C28 . 2.3705(14) yes
N5 . C28 5_655 2.3705(14) yes
N6 . C27 . 1.4444(7) yes
N6 . C27 5_655 2.154(13) yes
N6 . C28 . 0.000 yes
N6 . C28 5_655 1.11(2) yes
N6 . C29 . 1.3532(7) yes
N6 . C29 5_655 2.13(2) yes
N6 . H4 2_665 3.41(3) no
N6 . H21 7_555 3.17(6) no
N7 . N8 . 2.3304(13) yes
N7 . N8 5_655 2.3304(13) yes
N7 . C21 . 3.560(11) yes
N7 . C21 5_655 3.560(11) yes
N7 . C30 . 1.3931(6) yes
N7 . C30 5_655 1.3931(7) yes
N7 . C31 . 2.3304(13) yes
N7 . C31 5_655 2.3304(13) yes
N7 . H12 . 3.450(13) no
N7 . H12 5_655 3.450(13) no
N7 . H14 . 3.336(12) no
N7 . H14 5_655 3.336(12) no
N8 . C30 . 1.4700(8) yes
N8 . C30 5_655 2.139(11) yes
N8 . C31 . 0.000 yes
N8 . C31 5_655 1.142(18) yes
N8 . C32 . 1.3538(6) yes
N8 . C32 5_655 2.198(18) yes
N8 . H6 2_655 3.16(3) no
N8 . H6 6_555 2.95(4) no
N8 . H12 . 2.85(2) no
N8 . H12 5_655 3.437(12) no
C1 . C2 . 1.401(11) yes
C1 . C3 . 2.400(12) yes
C1 . C4 . 2.820(13) yes
C1 . C5 . 2.452(12) yes
C1 . C6 . 1.433(11) yes
C1 . C7 . 2.529(11) yes
C1 . C14 4_555 3.581(11) yes
C1 . C15 4_555 3.534(12) yes
C1 . C20 4_555 3.382(11) yes
C1 . H1 . 2.047(13) no
C1 . H2 . 3.253(12) no
C1 . H4 . 3.31(2) no
C1 . H5 . 3.34(2) no
C1 . H9 4_555 3.11(2) no
C2 . C3 . 1.366(11) yes
C2 . C4 . 2.424(14) yes
C2 . C5 . 2.800(13) yes
C2 . C6 . 2.441(12) yes
C2 . C14 4_555 3.347(12) yes
C2 . C15 4_555 3.571(13) yes
C2 . H1 . 0.95(1) no
C2 . H2 . 2.006(12) no
C2 . H3 . 3.28(2) no
C2 . H9 4_555 2.93(3) no
C2 . H15 4_555 3.45(3) no
C2 . H21 7_555 3.56(5) no
C3 . C4 . 1.404(13) yes
C3 . C5 . 2.405(13) yes
C3 . C6 . 2.785(13) yes
C3 . H1 . 2.02(2) no
C3 . H2 . 0.950(13) no
C3 . H3 . 2.06(2) no
C3 . H4 . 3.27(2) no
C4 . C5 . 1.392(12) yes
C4 . C6 . 2.435(12) yes
C4 . H1 . 3.28(2) no
C4 . H2 . 2.04(2) no
C4 . H3 . 0.95(1) no
C4 . H3 2_665 3.540(4) no
C4 . H4 . 2.04(2) no
C4 . H4 2_665 3.558(8) no
C5 . C6 . 1.410(11) yes
C5 . C7 . 2.439(11) yes
C5 . H2 . 3.26(2) no
C5 . H3 . 2.047(13) no
C5 . H3 2_665 3.361(8) no
C5 . H4 . 0.95(1) no
C5 . H5 . 2.567(12) no
C6 . C7 . 1.442(11) yes
C6 . C20 4_555 3.293(12) yes
C6 . H1 . 3.30(2) no
C6 . H3 . 3.295(13) no
C6 . H4 . 2.05(2) no
C6 . H5 . 2.056(13) no
C6 . H27 5_655 3.29(7) no
C7 . C8 . 2.414(11) yes
C7 . C9 . 2.803(11) yes
C7 . C10 . 3.157(11) yes
C7 . C11 . 3.587(11) yes
C7 . C20 4_555 3.598(11) yes
C7 . H4 . 2.587(12) no
C7 . H5 . 0.950(12) no
C7 . H7 . 2.570(13) no
C7 . H8 . 2.923(12) no
C7 . H9 . 3.501(12) no
C7 . H10 . 2.93(1) no
C7 . H14 . 3.522(13) no
C7 . H22 4_555 3.51(6) no
C7 . H27 5_655 3.03(7) no
C8 . C9 . 1.50(1) yes
C8 . C10 . 1.519(11) yes
C8 . C11 . 1.56(1) yes
C8 . C12 . 2.573(11) yes
C8 . C13 . 2.550(12) yes
C8 . H5 . 2.503(11) no
C8 . H6 . 2.03(1) no
C8 . H7 . 2.03(1) no
C8 . H8 . 2.029(12) no
C8 . H9 . 2.042(13) no
C8 . H10 . 2.04(1) no
C8 . H11 . 2.043(13) no
C8 . H12 . 3.39(2) no
C8 . H13 . 2.77(2) no
C8 . H14 . 2.73(2) no
C8 . H15 . 2.813(12) no
C8 . H16 . 2.650(12) no
C8 . H17 . 3.357(12) no
C9 . C10 . 2.460(12) yes
C9 . C11 . 2.542(11) yes
C9 . C12 . 2.907(12) yes
C9 . C13 . 3.201(12) yes
C9 . C32 6_554 3.269(18) yes
C9 . H5 . 2.388(12) no
C9 . H6 . 0.950(12) no
C9 . H7 . 0.950(12) no
C9 . H8 . 0.950(12) no
C9 . H9 . 3.281(12) no
C9 . H10 . 2.66(2) no
C9 . H11 . 2.61(1) no
C9 . H12 2_655 3.412(13) no
C9 . H13 . 2.601(13) no
C9 . H13 2_655 3.457(10) no
C9 . H14 . 3.078(12) no
C9 . H16 . 2.849(12) no
C10 . C11 . 2.550(11) yes
C10 . C13 . 2.920(12) yes
C10 . H1 4_555 3.09(3) no
C10 . H5 . 3.179(12) no
C10 . H6 . 2.635(12) no
C10 . H7 . 2.631(12) no
C10 . H8 . 3.29(2) no
C10 . H9 . 0.950(13) no
C10 . H10 . 0.950(11) no
C10 . H11 . 0.950(12) no
C10 . H15 . 2.694(11) no
C10 . H16 . 2.990(12) no
C10 . H20 6_554 3.27(6) no
C11 . C12 . 1.57(1) yes
C11 . C13 . 1.519(11) yes
C11 . C14 . 2.420(11) yes
C11 . H6 . 2.75(2) no
C11 . H7 . 3.36(2) no
C11 . H8 . 2.69(1) no
C11 . H9 . 2.67(2) no
C11 . H10 . 3.36(1) no
C11 . H11 . 2.79(1) no
C11 . H12 . 2.09(1) no
C11 . H13 . 2.090(12) no
C11 . H13 2_655 3.472(7) no
C11 . H14 . 2.09(1) no
C11 . H15 . 2.042(12) no
C11 . H16 . 2.042(12) no
C11 . H17 . 2.043(11) no
C11 . H18 . 2.52(1) no
C12 . C13 . 2.507(12) yes
C12 . C14 . 3.086(12) yes
C12 . C30 . 3.538(14) yes
C12 . H6 . 3.177(12) no
C12 . H6 2_655 3.278(12) no
C12 . H8 . 2.509(13) no
C12 . H12 . 0.950(12) no
C12 . H13 . 0.950(12) no
C12 . H13 2_655 2.940(4) no
C12 . H14 . 0.950(12) no
C12 . H15 . 3.32(2) no
C12 . H16 . 2.785(13) no
C12 . H16 2_655 3.170(12) no
C12 . H17 . 2.571(12) no
C12 . H18 . 3.121(13) no
C12 . H27 5_655 3.35(4) no
C13 . C14 . 2.816(12) yes
C13 . H1 4_555 3.52(3) no
C13 . H6 . 2.93(2) no
C13 . H8 . 3.508(12) no
C13 . H9 . 3.028(13) no
C13 . H11 . 2.663(13) no
C13 . H12 . 2.68(2) no
C13 . H13 . 2.69(1) no
C13 . H13 2_655 3.041(12) no
C13 . H14 . 3.33(1) no
C13 . H15 . 0.950(12) no
C13 . H16 . 0.950(13) no
C13 . H17 . 0.950(12) no
C13 . H18 . 2.41(2) no
C14 . C15 . 1.449(12) yes
C14 . C16 . 2.433(12) yes
C14 . C20 . 2.522(12) yes
C14 . H1 4_555 3.30(3) no
C14 . H12 . 2.834(12) no
C14 . H14 . 3.394(12) no
C14 . H15 . 2.831(13) no
C14 . H17 . 2.68(2) no
C14 . H18 . 0.950(12) no
C14 . H19 . 2.56(2) no
C15 . C16 . 1.407(12) yes
C15 . C17 . 2.439(13) yes
C15 . C18 . 2.774(12) yes
C15 . C19 . 2.406(13) yes
C15 . C20 . 1.401(12) yes
C15 . H18 . 2.06(1) no
C15 . H19 . 2.04(1) no
C15 . H20 . 3.30(2) no
C15 . H22 . 3.27(2) no
C16 . C17 . 1.376(13) yes
C16 . C18 . 2.362(15) yes
C16 . C19 . 2.749(15) yes
C16 . C20 . 2.414(13) yes
C16 . H11 6_555 3.54(4) no
C16 . H18 . 2.55(2) no
C16 . H19 . 0.95(2) no
C16 . H20 . 2.04(2) no
C16 . H21 . 3.22(2) no
C16 . H24 7_545 3.43(2) no
C17 . C18 . 1.385(14) yes
C17 . C19 . 2.415(15) yes
C17 . C20 . 2.817(13) yes
C17 . H9 6_555 3.52(4) no
C17 . H11 6_555 3.22(6) no
C17 . H19 . 2.01(2) no
C17 . H20 . 0.95(2) no
C17 . H21 . 2.03(2) no
C17 . H22 . 3.27(2) no
C18 . C19 . 1.380(12) yes
C18 . C20 . 2.409(12) yes
C18 . H1 7_545 3.58(4) no
C18 . H19 . 3.22(2) no
C18 . H20 . 2.04(2) no
C18 . H21 . 0.95(2) no
C18 . H22 . 2.03(2) no
C19 . C20 . 1.392(11) yes
C19 . H5 4_555 3.59(7) no
C19 . H20 . 3.27(2) no
C19 . H21 . 2.02(2) no
C19 . H22 . 0.95(1) no
C19 . H23 . 3.20(1) no
C19 . H24 . 3.49(2) no
C20 . C21 . 3.482(13) yes
C20 . H18 . 3.34(1) no
C20 . H19 . 3.27(1) no
C20 . H21 . 3.26(2) no
C20 . H22 . 2.04(1) no
C20 . H23 . 2.86(1) no
C21 . C22 . 1.482(12) yes
C21 . C23 . 2.502(13) yes
C21 . C30 . 3.475(12) yes
C21 . H20 7_555 3.01(3) no
C21 . H23 . 0.95(1) no
C21 . H24 . 2.67(2) no
C22 . C23 . 1.372(12) yes
C22 . C24 . 2.323(13) yes
C22 . C25 . 2.673(13) yes
C22 . C26 . 2.273(13) yes
C22 . H20 7_555 3.28(3) no
C22 . H23 . 2.14(2) no
C22 . H24 . 2.02(2) no
C22 . H25 . 3.19(2) no
C22 . H27 . 3.13(2) no
C23 . C24 . 1.303(13) yes
C23 . C25 . 2.324(14) yes
C23 . C26 . 2.682(15) yes
C23 . H19 7_555 3.20(3) no
C23 . H20 7_555 3.38(3) no
C23 . H23 . 2.74(1) no
C23 . H24 . 0.95(2) no
C23 . H25 . 1.97(2) no
C23 . H26 . 3.18(2) no
C24 . C25 . 1.398(14) yes
C24 . C26 . 2.383(15) yes
C24 . H2 6_565 3.29(4) no
C24 . H3 6_565 3.44(6) no
C24 . H17 6_555 3.50(4) no
C24 . H24 . 1.96(2) no
C24 . H25 . 0.95(2) no
C24 . H26 . 2.05(2) no
C24 . H27 . 3.24(2) no
C25 . C26 . 1.374(12) yes
C25 . H2 6_565 3.34(5) no
C25 . H3 6_565 2.95(6) no
C25 . H8 5_655 3.37(5) no
C25 . H17 6_555 3.40(4) no
C25 . H24 . 3.19(2) no
C25 . H25 . 2.05(2) no
C25 . H26 . 0.950(13) no
C25 . H27 . 2.01(2) no
C26 . H3 6_565 3.22(4) no
C26 . H8 5_655 3.54(3) no
C26 . H14 5_655 2.93(3) no
C26 . H25 . 3.25(2) no
C26 . H26 . 2.03(1) no
C26 . H27 . 0.950(13) no
C27 . C28 . 1.4444(7) yes
C27 . C28 5_655 2.154(13) yes
C27 . C29 . 2.4871(15) yes
C27 . C29 5_655 3.444(14) yes
C27 . H21 7_555 3.43(5) no
C28 . C29 . 1.3532(7) yes
C28 . C29 5_655 2.13(2) yes
C28 . H4 2_665 3.41(3) no
C28 . H21 7_555 3.17(6) no
C29 . H2 . 3.42(3) no
C29 . H4 2_665 3.01(4) no
C29 . H21 7_555 2.95(8) no
C30 . C31 . 1.4700(8) yes
C30 . C31 5_655 2.139(11) yes
C30 . C32 . 2.5135(15) yes
C30 . C32 5_655 3.459(11) yes
C30 . H6 6_555 3.56(3) no
C30 . H12 . 2.92(1) no
C30 . H14 . 3.27(1) no
C31 . C32 . 1.3538(6) yes
C31 . C32 5_655 2.198(18) yes
C31 . H6 2_655 3.16(3) no
C31 . H6 6_555 2.95(4) no
C31 . H12 . 2.85(2) no
C31 . H12 5_655 3.437(12) no
C32 . H6 2_655 3.44(4) no
C32 . H6 6_555 2.75(5) no
C32 . H7 6_555 2.93(5) no
C32 . H10 6_555 3.55(6) no
C32 . H11 6_555 3.28(6) no
C32 . H12 . 3.23(2) no
 

#==============================================================================

# Additional structures and associated data_? identifiers
# should be added at this point if there is more than one 
# structure analysis in the CIF.

#==============================================================================

#     End of CIF

#==============================================================================
